# Supplementary material for: Latent and Abnormal Functional Connectivity Circuits in Autism Spectrum Disorder
Source: Front Neurosci. 2017 Mar 21;11:125. doi: 10.3389/fnins.2017.00125 (PMC5359252; doi:10.3389/fnins.2017.00125)
Supplement: Supplementary file 2 [file Table2.XLSX]

## Sheet: Sheet1
Tstat	x1	y1	z1	Abbrev1	x2	y2	z2	Abbrev2
0.100373	-5.48	-14.92	41.57	DCG.L	8.02	-8.83	39.79	DCG.R
-0.427314	-5.48	-14.92	41.57	DCG.L	-4.85	-42.92	24.67	PCG.L
-1.0357	-5.48	-14.92	41.57	DCG.L	7.44	-41.81	21.87	PCG.R
0.451676	-5.48	-14.92	41.57	DCG.L	-36.36	-78.29	-7.84	IOG.L
1.91077	-5.48	-14.92	41.57	DCG.L	38.16	-81.99	-7.61	IOG.R
1.29352	-5.48	-14.92	41.57	DCG.L	-44.14	-60.82	35.59	ANG.L
0.248093	-5.48	-14.92	41.57	DCG.L	53.69	-31.07	-22.32	ITG.R
2.2056	-5.48	-14.92	41.57	DCG.L	-38.65	-5.68	50.94	PreCG.L
-1.51068	-5.48	-14.92	41.57	DCG.L	10.43	15.91	-11.26	OLF.R
1.26213	-5.48	-14.92	41.57	DCG.L	-16.54	-84.26	28.17	SOG.L
1.00337	-5.48	-14.92	41.57	DCG.L	24.29	-80.85	30.59	SOG.R
3.81166	-5.48	-14.92	41.57	DCG.L	-32.39	-80.73	16.11	MOG.L
2.89999	-5.48	-14.92	41.57	DCG.L	37.39	-79.7	19.42	MOG.R
2.24215	-5.48	-14.92	41.57	DCG.L	41.43	-25.49	52.55	PoCG.R
2.74009	-5.48	-14.92	41.57	DCG.L	-23.45	-59.56	58.96	SPG.L
1.92646	-5.48	-14.92	41.57	DCG.L	26.11	-59.18	62.06	SPG.R
3.43149	-5.48	-14.92	41.57	DCG.L	-42.8	-45.82	46.74	IPL.L
1.43459	-5.48	-14.92	41.57	DCG.L	7.48	-31.59	68.09	PCL.R
-1.26685	8.02	-8.83	39.79	DCG.R	-4.85	-42.92	24.67	PCG.L
-1.72852	8.02	-8.83	39.79	DCG.R	7.44	-41.81	21.87	PCG.R
0.451092	8.02	-8.83	39.79	DCG.R	-36.36	-78.29	-7.84	IOG.L
0.837263	8.02	-8.83	39.79	DCG.R	38.16	-81.99	-7.61	IOG.R
0.45551	8.02	-8.83	39.79	DCG.R	-44.14	-60.82	35.59	ANG.L
0.14296	8.02	-8.83	39.79	DCG.R	53.69	-31.07	-22.32	ITG.R
2.31265	8.02	-8.83	39.79	DCG.R	-38.65	-5.68	50.94	PreCG.L
-2.44838	8.02	-8.83	39.79	DCG.R	10.43	15.91	-11.26	OLF.R
1.848	8.02	-8.83	39.79	DCG.R	-16.54	-84.26	28.17	SOG.L
1.8409	8.02	-8.83	39.79	DCG.R	24.29	-80.85	30.59	SOG.R
3.78868	8.02	-8.83	39.79	DCG.R	-32.39	-80.73	16.11	MOG.L
3.34482	8.02	-8.83	39.79	DCG.R	37.39	-79.7	19.42	MOG.R
2.65713	8.02	-8.83	39.79	DCG.R	41.43	-25.49	52.55	PoCG.R
3.47523	8.02	-8.83	39.79	DCG.R	-23.45	-59.56	58.96	SPG.L
2.34446	8.02	-8.83	39.79	DCG.R	26.11	-59.18	62.06	SPG.R
4.11857	8.02	-8.83	39.79	DCG.R	-42.8	-45.82	46.74	IPL.L
1.82013	8.02	-8.83	39.79	DCG.R	7.48	-31.59	68.09	PCL.R
-1.94416	-4.85	-42.92	24.67	PCG.L	7.44	-41.81	21.87	PCG.R
1.81658	-4.85	-42.92	24.67	PCG.L	-36.36	-78.29	-7.84	IOG.L
1.39979	-4.85	-42.92	24.67	PCG.L	38.16	-81.99	-7.61	IOG.R
-0.18584	-4.85	-42.92	24.67	PCG.L	-44.14	-60.82	35.59	ANG.L
-0.18343	-4.85	-42.92	24.67	PCG.L	53.69	-31.07	-22.32	ITG.R
2.86283	-4.85	-42.92	24.67	PCG.L	-38.65	-5.68	50.94	PreCG.L
-2.3851	-4.85	-42.92	24.67	PCG.L	10.43	15.91	-11.26	OLF.R
3.68382	-4.85	-42.92	24.67	PCG.L	-16.54	-84.26	28.17	SOG.L
3.26885	-4.85	-42.92	24.67	PCG.L	24.29	-80.85	30.59	SOG.R
2.83535	-4.85	-42.92	24.67	PCG.L	-32.39	-80.73	16.11	MOG.L
2.58341	-4.85	-42.92	24.67	PCG.L	37.39	-79.7	19.42	MOG.R
1.73163	-4.85	-42.92	24.67	PCG.L	41.43	-25.49	52.55	PoCG.R
2.68983	-4.85	-42.92	24.67	PCG.L	-23.45	-59.56	58.96	SPG.L
2.34139	-4.85	-42.92	24.67	PCG.L	26.11	-59.18	62.06	SPG.R
3.26215	-4.85	-42.92	24.67	PCG.L	-42.8	-45.82	46.74	IPL.L
0.766296	-4.85	-42.92	24.67	PCG.L	7.48	-31.59	68.09	PCL.R
1.5825	7.44	-41.81	21.87	PCG.R	-36.36	-78.29	-7.84	IOG.L
2.03399	7.44	-41.81	21.87	PCG.R	38.16	-81.99	-7.61	IOG.R
-0.332318	7.44	-41.81	21.87	PCG.R	-44.14	-60.82	35.59	ANG.L
0.435878	7.44	-41.81	21.87	PCG.R	53.69	-31.07	-22.32	ITG.R
2.52703	7.44	-41.81	21.87	PCG.R	-38.65	-5.68	50.94	PreCG.L
-2.15543	7.44	-41.81	21.87	PCG.R	10.43	15.91	-11.26	OLF.R
3.10741	7.44	-41.81	21.87	PCG.R	-16.54	-84.26	28.17	SOG.L
2.57577	7.44	-41.81	21.87	PCG.R	24.29	-80.85	30.59	SOG.R
2.41835	7.44	-41.81	21.87	PCG.R	-32.39	-80.73	16.11	MOG.L
2.37328	7.44	-41.81	21.87	PCG.R	37.39	-79.7	19.42	MOG.R
1.02218	7.44	-41.81	21.87	PCG.R	41.43	-25.49	52.55	PoCG.R
2.13655	7.44	-41.81	21.87	PCG.R	-23.45	-59.56	58.96	SPG.L
2.20078	7.44	-41.81	21.87	PCG.R	26.11	-59.18	62.06	SPG.R
3.40793	7.44	-41.81	21.87	PCG.R	-42.8	-45.82	46.74	IPL.L
1.8188	7.44	-41.81	21.87	PCG.R	7.48	-31.59	68.09	PCL.R
-1.5288	-36.36	-78.29	-7.84	IOG.L	38.16	-81.99	-7.61	IOG.R
2.18341	-36.36	-78.29	-7.84	IOG.L	-44.14	-60.82	35.59	ANG.L
-1.71469	-36.36	-78.29	-7.84	IOG.L	53.69	-31.07	-22.32	ITG.R
-1.87619	-36.36	-78.29	-7.84	IOG.L	-38.65	-5.68	50.94	PreCG.L
-0.554661	-36.36	-78.29	-7.84	IOG.L	10.43	15.91	-11.26	OLF.R
-1.4295	-36.36	-78.29	-7.84	IOG.L	-16.54	-84.26	28.17	SOG.L
-1.83247	-36.36	-78.29	-7.84	IOG.L	24.29	-80.85	30.59	SOG.R
-1.86863	-36.36	-78.29	-7.84	IOG.L	-32.39	-80.73	16.11	MOG.L
-1.59138	-36.36	-78.29	-7.84	IOG.L	37.39	-79.7	19.42	MOG.R
-2.63385	-36.36	-78.29	-7.84	IOG.L	41.43	-25.49	52.55	PoCG.R
-2.56849	-36.36	-78.29	-7.84	IOG.L	-23.45	-59.56	58.96	SPG.L
-3.12772	-36.36	-78.29	-7.84	IOG.L	26.11	-59.18	62.06	SPG.R
-2.47892	-36.36	-78.29	-7.84	IOG.L	-42.8	-45.82	46.74	IPL.L
-3.34871	-36.36	-78.29	-7.84	IOG.L	7.48	-31.59	68.09	PCL.R
0.134909	38.16	-81.99	-7.61	IOG.R	-44.14	-60.82	35.59	ANG.L
-1.9973	38.16	-81.99	-7.61	IOG.R	53.69	-31.07	-22.32	ITG.R
-1.93211	38.16	-81.99	-7.61	IOG.R	-38.65	-5.68	50.94	PreCG.L
-0.337747	38.16	-81.99	-7.61	IOG.R	10.43	15.91	-11.26	OLF.R
-1.65734	38.16	-81.99	-7.61	IOG.R	-16.54	-84.26	28.17	SOG.L
-1.28815	38.16	-81.99	-7.61	IOG.R	24.29	-80.85	30.59	SOG.R
-1.9125	38.16	-81.99	-7.61	IOG.R	-32.39	-80.73	16.11	MOG.L
-1.67275	38.16	-81.99	-7.61	IOG.R	37.39	-79.7	19.42	MOG.R
-3.04133	38.16	-81.99	-7.61	IOG.R	41.43	-25.49	52.55	PoCG.R
-2.6139	38.16	-81.99	-7.61	IOG.R	-23.45	-59.56	58.96	SPG.L
-1.97038	38.16	-81.99	-7.61	IOG.R	26.11	-59.18	62.06	SPG.R
-2.33802	38.16	-81.99	-7.61	IOG.R	-42.8	-45.82	46.74	IPL.L
-2.50866	38.16	-81.99	-7.61	IOG.R	7.48	-31.59	68.09	PCL.R
-1.55506	-44.14	-60.82	35.59	ANG.L	53.69	-31.07	-22.32	ITG.R
1.02625	-44.14	-60.82	35.59	ANG.L	-38.65	-5.68	50.94	PreCG.L
-1.34647	-44.14	-60.82	35.59	ANG.L	10.43	15.91	-11.26	OLF.R
1.92423	-44.14	-60.82	35.59	ANG.L	-16.54	-84.26	28.17	SOG.L
1.28285	-44.14	-60.82	35.59	ANG.L	24.29	-80.85	30.59	SOG.R
2.19285	-44.14	-60.82	35.59	ANG.L	-32.39	-80.73	16.11	MOG.L
0.732539	-44.14	-60.82	35.59	ANG.L	37.39	-79.7	19.42	MOG.R
2.14335	-44.14	-60.82	35.59	ANG.L	41.43	-25.49	52.55	PoCG.R
2.57151	-44.14	-60.82	35.59	ANG.L	-23.45	-59.56	58.96	SPG.L
2.9617	-44.14	-60.82	35.59	ANG.L	26.11	-59.18	62.06	SPG.R
1.97525	-44.14	-60.82	35.59	ANG.L	-42.8	-45.82	46.74	IPL.L
-0.330557	-44.14	-60.82	35.59	ANG.L	7.48	-31.59	68.09	PCL.R
-1.1232	53.69	-31.07	-22.32	ITG.R	-38.65	-5.68	50.94	PreCG.L
1.89177	53.69	-31.07	-22.32	ITG.R	10.43	15.91	-11.26	OLF.R
-2.34874	53.69	-31.07	-22.32	ITG.R	-16.54	-84.26	28.17	SOG.L
-2.57808	53.69	-31.07	-22.32	ITG.R	24.29	-80.85	30.59	SOG.R
-2.56031	53.69	-31.07	-22.32	ITG.R	-32.39	-80.73	16.11	MOG.L
-3.08292	53.69	-31.07	-22.32	ITG.R	37.39	-79.7	19.42	MOG.R
-1.51903	53.69	-31.07	-22.32	ITG.R	41.43	-25.49	52.55	PoCG.R
-1.80797	53.69	-31.07	-22.32	ITG.R	-23.45	-59.56	58.96	SPG.L
-1.76459	53.69	-31.07	-22.32	ITG.R	26.11	-59.18	62.06	SPG.R
-3.07548	53.69	-31.07	-22.32	ITG.R	-42.8	-45.82	46.74	IPL.L
-0.108518	53.69	-31.07	-22.32	ITG.R	7.48	-31.59	68.09	PCL.R
2.1855	-38.65	-5.68	50.94	PreCG.L	10.43	15.91	-11.26	OLF.R
-0.203671	-38.65	-5.68	50.94	PreCG.L	-16.54	-84.26	28.17	SOG.L
-0.825008	-38.65	-5.68	50.94	PreCG.L	24.29	-80.85	30.59	SOG.R
-0.720162	-38.65	-5.68	50.94	PreCG.L	-32.39	-80.73	16.11	MOG.L
-2.47769	-38.65	-5.68	50.94	PreCG.L	37.39	-79.7	19.42	MOG.R
0.784168	-38.65	-5.68	50.94	PreCG.L	41.43	-25.49	52.55	PoCG.R
0.0792465	-38.65	-5.68	50.94	PreCG.L	-23.45	-59.56	58.96	SPG.L
-1.05194	-38.65	-5.68	50.94	PreCG.L	26.11	-59.18	62.06	SPG.R
-2.48271	-38.65	-5.68	50.94	PreCG.L	-42.8	-45.82	46.74	IPL.L
-0.994071	-38.65	-5.68	50.94	PreCG.L	7.48	-31.59	68.09	PCL.R
1.44793	10.43	15.91	-11.26	OLF.R	-16.54	-84.26	28.17	SOG.L
2.43405	10.43	15.91	-11.26	OLF.R	24.29	-80.85	30.59	SOG.R
0.565574	10.43	15.91	-11.26	OLF.R	-32.39	-80.73	16.11	MOG.L
1.29517	10.43	15.91	-11.26	OLF.R	37.39	-79.7	19.42	MOG.R
1.50784	10.43	15.91	-11.26	OLF.R	41.43	-25.49	52.55	PoCG.R
0.62205	10.43	15.91	-11.26	OLF.R	-23.45	-59.56	58.96	SPG.L
0.437289	10.43	15.91	-11.26	OLF.R	26.11	-59.18	62.06	SPG.R
0.229011	10.43	15.91	-11.26	OLF.R	-42.8	-45.82	46.74	IPL.L
2.29405	10.43	15.91	-11.26	OLF.R	7.48	-31.59	68.09	PCL.R
-0.0692958	-16.54	-84.26	28.17	SOG.L	24.29	-80.85	30.59	SOG.R
-0.016519	-16.54	-84.26	28.17	SOG.L	-32.39	-80.73	16.11	MOG.L
-0.279793	-16.54	-84.26	28.17	SOG.L	37.39	-79.7	19.42	MOG.R
-0.141063	-16.54	-84.26	28.17	SOG.L	41.43	-25.49	52.55	PoCG.R
-0.265831	-16.54	-84.26	28.17	SOG.L	-23.45	-59.56	58.96	SPG.L
-0.287727	-16.54	-84.26	28.17	SOG.L	26.11	-59.18	62.06	SPG.R
0.249383	-16.54	-84.26	28.17	SOG.L	-42.8	-45.82	46.74	IPL.L
-0.613267	-16.54	-84.26	28.17	SOG.L	7.48	-31.59	68.09	PCL.R
-0.551052	24.29	-80.85	30.59	SOG.R	-32.39	-80.73	16.11	MOG.L
0.191935	24.29	-80.85	30.59	SOG.R	37.39	-79.7	19.42	MOG.R
-0.868273	24.29	-80.85	30.59	SOG.R	41.43	-25.49	52.55	PoCG.R
-0.676608	24.29	-80.85	30.59	SOG.R	-23.45	-59.56	58.96	SPG.L
-0.471239	24.29	-80.85	30.59	SOG.R	26.11	-59.18	62.06	SPG.R
-0.614602	24.29	-80.85	30.59	SOG.R	-42.8	-45.82	46.74	IPL.L
-1.77313	24.29	-80.85	30.59	SOG.R	7.48	-31.59	68.09	PCL.R
-1.79212	-32.39	-80.73	16.11	MOG.L	37.39	-79.7	19.42	MOG.R
-1.27726	-32.39	-80.73	16.11	MOG.L	41.43	-25.49	52.55	PoCG.R
-0.917142	-32.39	-80.73	16.11	MOG.L	-23.45	-59.56	58.96	SPG.L
-1.17379	-32.39	-80.73	16.11	MOG.L	26.11	-59.18	62.06	SPG.R
-0.39707	-32.39	-80.73	16.11	MOG.L	-42.8	-45.82	46.74	IPL.L
-1.98686	-32.39	-80.73	16.11	MOG.L	7.48	-31.59	68.09	PCL.R
-1.10715	37.39	-79.7	19.42	MOG.R	41.43	-25.49	52.55	PoCG.R
-1.58508	37.39	-79.7	19.42	MOG.R	-23.45	-59.56	58.96	SPG.L
-1.05137	37.39	-79.7	19.42	MOG.R	26.11	-59.18	62.06	SPG.R
-1.23323	37.39	-79.7	19.42	MOG.R	-42.8	-45.82	46.74	IPL.L
-2.00406	37.39	-79.7	19.42	MOG.R	7.48	-31.59	68.09	PCL.R
0.816112	41.43	-25.49	52.55	PoCG.R	-23.45	-59.56	58.96	SPG.L
0.782692	41.43	-25.49	52.55	PoCG.R	26.11	-59.18	62.06	SPG.R
0.645108	41.43	-25.49	52.55	PoCG.R	-42.8	-45.82	46.74	IPL.L
-3.8645	41.43	-25.49	52.55	PoCG.R	7.48	-31.59	68.09	PCL.R
-2.41832	-23.45	-59.56	58.96	SPG.L	26.11	-59.18	62.06	SPG.R
-0.424677	-23.45	-59.56	58.96	SPG.L	-42.8	-45.82	46.74	IPL.L
-1.00863	-23.45	-59.56	58.96	SPG.L	7.48	-31.59	68.09	PCL.R
-1.60975	26.11	-59.18	62.06	SPG.R	-42.8	-45.82	46.74	IPL.L
0.287924	26.11	-59.18	62.06	SPG.R	7.48	-31.59	68.09	PCL.R
-0.313209	-42.8	-45.82	46.74	IPL.L	7.48	-31.59	68.09	PCL.R
